# Supplementary material for: Discovery of biclonal origin and a novel oncogene SLC12A5 in colon cancer by single-cell sequencing
Source: Springer Nature journal article supplement (doi:10.1038/cr.2014.43), 2014-04-04
Supplement: 41422_2014_BFcr201443_MOESM50_ESM.pdf [file 41422_2014_BFcr201443_MOESM50_ESM.pdf]

**Supplementary information, Table S1** A complete list of somatic mutations identified in 63 colon cancer cells by single-cell exomic sequencing.

| chr   | pos       | reference | normal | mutate | region | gene      | transcript   | chain | function   | base substitution | AA substitution | dbSNP132  |
|-------|-----------|-----------|--------|--------|--------|-----------|--------------|-------|------------|-------------------|-----------------|-----------|
| chr1  | 1946244   | G         | G      | A      | CDS    | GABRD     | NM_000815    | +     | synonymous | c.72G>A           | p.A24A          | novel     |
| chr1  | 2525223   | C         | C      | T      | CDS    | MMEL1     | NM_033467    | -     | missense   | c.1001G>A         | p.R334Q         | novel     |
| chr1  | 7922550   | C         | C      | T      | CDS    | TNFRSF9   | NM_001561    | -     | missense   | c.92G>A           | p.C31Y          | novel     |
| chr1  | 12829995  | T         | T      | A      | CDS    | LOC649330 | NM_001146181 | -     | missense   | c.735A>T          | p.E245D         | novel     |
| chr1  | 22775608  | C         | C      | T      | CDS    | EPHA8     | NM_001006943 | +     | synonymous | c.471C>T          | p.A157A         | novel     |
| chr1  | 33009474  | A         | A      | G      | CDS    | KIAA1522  | NM_020888    | +     | missense   | c.2107A>G         | p.S703G         | novel     |
| chr1  | 45566228  | C         | C      | T      | CDS    | HPDL      | NM_032756    | +     | missense   | c.821C>T          | p.A274V         | novel     |
| chr1  | 74845141  | C         | C      | T      | CDS    | C1orf173  | NM_001002912 | -     | synonymous | c.1221G>A         | p.P407P         | novel     |
| chr1  | 85371114  | T         | T      | C      | intron | WDR63     | NM_145172    | +     |            |                   |                 | novel     |
| chr1  | 89298430  | G         | G      | A      | intron | GBP1      | NM_002053    | -     |            |                   |                 | novel     |
| chr1  | 100118749 | G         | G      | T      | intron | AGL       | NM_000645    | +     |            |                   |                 | novel     |
| chr1  | 109241230 | G         | G      | A      | CDS    | GPSM2     | NM_013296    | +     | missense   | c.278G>A          | p.R93K          | novel     |
| chr1  | 150046753 | G         | G      | A      | intron | RORC      | NM_001001523 | -     |            |                   |                 | novel     |
| chr1  | 152514509 | G         | G      | A      | CDS    | HAX1      | NM_001018837 | +     | missense   | c.536G>A          | p.R179Q         | novel     |
| chr1  | 154304809 | C         | C      | T      | CDS    | RAB25     | NM_020387    | +     | missense   | c.364C>T          | p.L122F         | novel     |
| chr1  | 158449920 | G         | G      | C      | utr    | PEA15     | NM_003768    | +     |            |                   |                 | novel     |
| chr1  | 172047037 | C         | C      | G      | CDS    | CENPL     | NM_033319    | -     | missense   | c.24G>C           | p.E8D           | novel     |
| chr1  | 184324040 | A         | A      | G      | intron | HMCN1     | NM_031935    | +     |            |                   |                 | novel     |
| chr1  | 199284428 | A         | A      | C      | CDS    | CACNA1S   | NM_000069    | -     | missense   | c.4346T>G         | p.V1449G        | novel     |
| chr1  | 234969455 | G         | G      | A      | CDS    | ACTN2     | NM_001103    | +     | synonymous | c.1107G>A         | p.S369S         | novel     |
| chr10 | 17796636  | A         | A      | C      | CDS    | STAM      | NM_003473    | +     | missense   | c.1474A>C         | p.T492P         | novel     |
| chr10 | 63522710  | G         | G      | A      | CDS    | ARID5B    | NM_032199    | +     | missense   | c.3482G>A         | p.S1161N        | novel     |
| chr10 | 97086714  | C         | C      | T      | CDS    | SORBS1    | NM_001034954 | -     | missense   | c.3193G>A         | p.A1065T        | novel     |
| chr11 | 1575979   | A         | A      | G      | CDS    | KRTAP5-2  | NM_001004325 | -     | synonymous | c.78T>C           | p.S26S          | novel     |
| chr11 | 1575999   | T         | T      | C      | CDS    | KRTAP5-2  | NM_001004325 | -     | missense   | c.58A>G           | p.S20G          | novel     |
| chr11 | 1576066   | G         | G      | A      | utr    | KRTAP5-2  | NM_001004325 | -     |            |                   |                 | novel     |
| chr11 | 1900825   | T         | T      | C      | intron | TNNT3     | NM_006757    | +     |            |                   |                 | novel     |
| chr11 | 4860562   | C         | C      | T      | CDS    | OR51T1    | NM_001004759 | +     | missense   | c.938C>T          | p.P313L         | novel     |
| chr11 | 40093225  | C         | C      | T      | CDS    | LRRC4C    | NM_020929    | -     | synonymous | c.1194G>A         | p.A398A         | novel     |
| chr11 | 51268507  | C         | C      | T      | CDS    | OR4A5     | NM_001005272 | -     | synonymous | c.465G>A          | p.A155A         | novel     |
| chr11 | 55335655  | T         | T      | C      | CDS    | OR5L1     | NM_001004738 | +     | missense   | c.137T>C          | p.I46T          | novel     |
| chr11 | 59613806  | C         | C      | T      | CDS    | MS4A2     | NM_000139    | +     | missense   | c.122C>T          | p.S41L          | novel     |
| chr11 | 59617597  | C         | C      | T      | CDS    | MS4A2     | NM_000139    | +     | missense   | c.527C>T          | p.S176F         | novel     |
| chr11 | 61714343  | C         | C      | T      | CDS    | SCGB1D1   | NM_006552    | +     | missense   | c.11C>T           | p.S4L           | novel     |
| chr11 | 67189375  | G         | G      | A      | CDS    | ALDH3B2   | NM_001031615 | -     | synonymous | c.663C>T          | p.R221R         | novel     |
| chr11 | 71184774  | G         | G      | A      | CDS    | FAM86C    | NM_152563    | +     | missense   | c.223G>A          | p.A75T          | rs6423769 |
| chr12 | 48230370  | G         | G      | A      | CDS    | KCNH3     | NM_012284    | +     | missense   | c.1909G>A         | p.A637T         | novel     |
| chr12 | 54045631  | C         | C      | G      | CDS    | OR6C75    | NM_001005497 | +     | missense   | c.470C>G          | p.P157R         | novel     |

|       |           |   |   |   |        |          |              |   |            |           |          |            |
|-------|-----------|---|---|---|--------|----------|--------------|---|------------|-----------|----------|------------|
| chr12 | 55110280  | C | C | T | CDS    | TIMELESS | NM_003920    | - | missense   | c.962G>A  | p.R321H  | novel      |
| chr12 | 77036186  | A | A | G | CDS    | NAV3     | NM_014903    | + | synonymous | c.3018A>G | p.G1006G | novel      |
| chr12 | 95165431  | G | G | C | CDS    | ELK3     | NM_005230    | + | missense   | c.790G>C  | p.A264P  | novel      |
| chr12 | 102644093 | C | C | T | intron | STAB2    | NM_017564    | + |            |           |          | novel      |
| chr12 | 111376816 | T | T | G | CDS    | PTPN11   | NM_002834    | + | nonsense   | c.591T>G  | p.Y197*  | novel      |
| chr12 | 128260035 | C | C | A | CDS    | TMEM132D | NM_133448    | - | missense   | c.1426G>T | p.D476Y  | novel      |
| chr13 | 23914762  | G | G | A | CDS    | PARP4    | NM_006437    | - | missense   | c.3509C>T | p.T1170I | novel      |
| chr13 | 24568907  | C | C | A | CDS    | PABPC3   | NM_030979    | + | missense   | c.571C>A  | p.P191T  | novel      |
| chr13 | 24568919  | A | A | G | CDS    | PABPC3   | NM_030979    | + | missense   | c.583A>G  | p.I195V  | novel      |
| chr13 | 24569451  | A | A | G | CDS    | PABPC3   | NM_030979    | + | missense   | c.1115A>G | p.E372G  | novel      |
| chr13 | 24569465  | T | T | C | CDS    | PABPC3   | NM_030979    | + | missense   | c.1129T>C | p.Y377H  | novel      |
| chr13 | 24569477  | G | G | C | CDS    | PABPC3   | NM_030979    | + | missense   | c.1141G>C | p.E381Q  | novel      |
| chr13 | 27265831  | G | G | A | CDS    | GSX1     | NM_145657    | + | missense   | c.541G>A  | p.A181T  | novel      |
| chr13 | 87128364  | G | G | A | CDS    | SLITRK5  | NM_015567    | + | missense   | c.2720G>A | p.G907E  | novel      |
| chr14 | 52396087  | C | C | T | CDS    | FERMT2   | NM_001135000 | - | missense   | c.1844G>A | p.R615H  | novel      |
| chr15 | 27173807  | C | C | T | CDS    | APBA2    | NM_005503    | + | missense   | c.1250C>T | p.A417V  | novel      |
| chr15 | 48572250  | C | C | A | CDS    | USP8     | NM_001128610 | + | synonymous | c.2295C>A | p.L765L  | novel      |
| chr15 | 48572282  | T | T | C | CDS    | USP8     | NM_001128610 | + | missense   | c.2327T>C | p.L776P  | novel      |
| chr15 | 70428679  | G | G | A | intron | HEXA     | NM_000520    | - |            |           |          | novel      |
| chr15 | 72155350  | C | C | G | CDS    | GOLGA6A  | NM_001038640 | - | missense   | c.594G>C  | p.Q198H  | rs58551153 |
| chr15 | 99264959  | C | C | T | CDS    | ALDH1A3  | NM_000693    | + | synonymous | c.1344C>T | p.L448L  | novel      |
| chr16 | 2749170   | C | C | T | CDS    | SRRM2    | NM_016333    | + | missense   | c.685C>T  | p.H229Y  | novel      |
| chr16 | 4103882   | C | C | G | CDS    | ADCY9    | NM_001116    | - | missense   | c.1563G>C | p.E521D  | novel      |
| chr16 | 48227271  | C | C | T | CDS    | ZNF423   | NM_015069    | - | missense   | c.3293G>A | p.R1098H | novel      |
| chr16 | 48322253  | G | G | A | CDS    | ZNF423   | NM_015069    | - | synonymous | c.207C>T  | p.C69C   | novel      |
| chr16 | 56275865  | C | C | T | CDS    | GPR97    | NM_170776    | + | missense   | c.1225C>T | p.R409C  | novel      |
| chr16 | 66583316  | G | G | A | CDS    | DPEP2    | NM_022355    | - | synonymous | c.588C>T  | p.S196S  | novel      |
| chr16 | 66952662  | T | T | G | CDS    | SMPD3    | NM_018667    | - | missense   | c.1916A>C | p.H639P  | novel      |
| chr16 | 68530840  | G | G | T | intron | WWP2     | NM_007014    | + |            |           |          | novel      |
| chr17 | 4977485   | A | A | C | CDS    | USP6     | NM_004505    | + | synonymous | c.300A>C  | p.G100G  | novel      |
| chr17 | 4977508   | C | C | T | CDS    | USP6     | NM_004505    | + | missense   | c.323C>T  | p.P108L  | novel      |
| chr17 | 4977547   | T | T | C | CDS    | USP6     | NM_004505    | + | missense   | c.362T>C  | p.L121S  | novel      |
| chr17 | 4979242   | G | G | C | intron | USP6     | NM_004505    | + |            |           |          | novel      |
| chr17 | 4979257   | A | A | C | CDS    | USP6     | NM_004505    | + | synonymous | c.499A>C  | p.R167R  | rs60299784 |
| chr17 | 7517846   | G | G | A | CDS    | TP53     | NM_001126112 | - | missense   | c.817C>T  | p.R273C  | novel      |
| chr17 | 36409599  | G | G | T | CDS    | KRTAP3-2 | NM_031959    | - | synonymous | c.33C>A   | p.V11V   | novel      |
| chr17 | 36849010  | G | G | A | CDS    | KRT38    | NM_006771    | - | nonsense   | c.703C>T  | p.Q235*  | novel      |
| chr17 | 37713100  | T | T | G | intron | STAT5A   | NM_003152    | + |            |           |          | novel      |
| chr17 | 38250142  | A | A | G | utr    | AOC2     | NM_001158    | + |            |           |          | novel      |
| chr17 | 42589415  | A | A | G | CDS    | CDC27    | NM_001114091 | - | synonymous | c.705T>C  | p.I235I  | rs3208661  |
| chr17 | 42589724  | T | T | C | CDS    | CDC27    | NM_001114091 | - | synonymous | c.501A>G  | p.T167T  | novel      |

|       |           |   |   |   |        |          |              |   |            |            |          |            |
|-------|-----------|---|---|---|--------|----------|--------------|---|------------|------------|----------|------------|
| chr17 | 42590597  | G | G | T | CDS    | CDC27    | NM_001114091 | - | missense   | c.449C>A   | p.S150Y  | novel      |
| chr17 | 69869451  | G | G | A | intron | BTBD17   | NM_001080466 | - |            |            |          | novel      |
| chr17 | 71265129  | C | C | G | CDS    | ITGB4    | NM_001005619 | + | synonymous | c.5316C>G  | p.G1772G | novel      |
| chr17 | 71344515  | C | C | T | CDS    | UNC13D   | NM_199242    | - | missense   | c.1135G>A  | p.E379K  | novel      |
| chr17 | 74378605  | C | C | T | CDS    | TIMP2    | NM_003255    | - | missense   | c.310G>A   | p.V104I  | novel      |
| chr17 | 75956367  | A | A | T | CDS    | RNF213   | NM_020914    | + | missense   | c.12131A>T | p.Q4044L | novel      |
| chr18 | 11742600  | G | G | A | intron | GNAL     | NM_002071    | + |            |            |          | novel      |
| chr18 | 59796577  | T | T | C | CDS    | SERPINB8 | NM_001031848 | + | synonymous | c.55T>C    | p.L19L   | novel      |
| chr19 | 2061833   | C | C | G | CDS    | AP3D1    | NM_003938    | - | missense   | c.2862G>C  | p.E954D  | novel      |
| chr19 | 48074185  | A | A | G | CDS    | PSG1     | NM_006905    | - | synonymous | c.150T>C   | p.D50D   | rs1058957  |
| chr19 | 48074196  | C | C | T | CDS    | PSG1     | NM_006905    | - | missense   | c.139G>A   | p.E47K   | rs1058956  |
| chr19 | 48277280  | T | T | C | intron | PSG2     | NM_031246    | - |            |            |          | novel      |
| chr19 | 49583042  | C | C | G | CDS    | ZNF285A  | NM_152354    | - | missense   | c.1205G>C  | p.C402S  | novel      |
| chr19 | 49583057  | T | T | C | CDS    | ZNF285A  | NM_152354    | - | missense   | c.1190A>G  | p.E397G  | novel      |
| chr19 | 49583131  | A | A | G | CDS    | ZNF285A  | NM_152354    | - | synonymous | c.1116T>C  | p.Y372Y  | novel      |
| chr19 | 49583144  | C | C | A | CDS    | ZNF285A  | NM_152354    | - | missense   | c.1103G>T  | p.G368V  | novel      |
| chr19 | 49583168  | C | C | G | CDS    | ZNF285A  | NM_152354    | - | missense   | c.1079G>C  | p.C360S  | novel      |
| chr19 | 49672827  | G | G | C | CDS    | ZNF180   | NM_013256    | - | missense   | c.1711C>G  | p.H571D  | novel      |
| chr19 | 56611091  | A | A | G | CDS    | SIGLEC10 | NM_033130    | - | synonymous | c.897T>C   | p.H299H  | novel      |
| chr19 | 56611114  | T | T | C | CDS    | SIGLEC10 | NM_033130    | - | missense   | c.874A>G   | p.N292D  | novel      |
| chr19 | 59974073  | T | T | G | intron | KIR3DP1  | NM_001015070 | + |            |            |          | novel      |
| chr19 | 60069800  | A | A | T | CDS    | KIR3DL2  | NM_006737    | + | missense   | c.1170A>T  | p.E390D  | novel      |
| chr19 | 60795948  | T | T | C | CDS    | FIZ1     | NM_032836    | - | missense   | c.1171A>G  | p.T391A  | rs7247236  |
| chr2  | 9416518   | C | C | G | intron | ASAP2    | NM_001135191 | + |            |            |          | novel      |
| chr2  | 73637965  | G | G | C | CDS    | ALMS1    | NM_015120    | + | missense   | c.10186G>C | p.E3396Q | novel      |
| chr2  | 94906103  | G | G | T | CDS    | TEKT4    | NM_144705    | + | synonymous | c.1170G>T  | p.L390L  | novel      |
| chr2  | 127164381 | A | A | C | intron | GYPC     | NM_002101    | + |            |            |          | novel      |
| chr2  | 153299856 | C | C | T | CDS    | ARL6IP6  | NM_152522    | + | missense   | c.557C>T   | p.P186L  | novel      |
| chr2  | 167813549 | G | G | C | CDS    | XIRP2    | NM_152381    | + | missense   | c.7401G>C  | p.M2467I | novel      |
| chr2  | 172661274 | C | C | A | utr    | DLX1     | NM_001038493 | + |            |            |          | novel      |
| chr2  | 178965370 | T | T | C | intron | OSBPL6   | NM_145739    | + |            |            |          | novel      |
| chr2  | 191869084 | A | A | T | CDS    | MYO1B    | NM_001161819 | + | synonymous | c.138A>T   | p.T46T   | rs17854823 |
| chr2  | 198657002 | G | G | A | CDS    | PLCL1    | NM_006226    | + | synonymous | c.516G>A   | p.T172T  | novel      |
| chr2  | 201235826 | T | T | G | CDS    | AOX1     | NM_001159    | + | synonymous | c.3432T>G  | p.G1144G | novel      |
| chr2  | 210867234 | C | C | A | CDS    | MYL1     | NM_079420    | - | missense   | c.458G>T   | p.R153L  | novel      |
| chr20 | 8556988   | G | G | A | CDS    | PLCB1    | NM_015192    | + | synonymous | c.294G>A   | p.L98L   | novel      |
| chr20 | 38750150  | G | G | A | CDS    | MAFB     | NM_005461    | - | missense   | c.755C>T   | p.A252V  | novel      |
| chr20 | 39266111  | T | T | G | CDS    | ZHX3     | NM_015035    | - | missense   | c.860A>C   | p.H287P  | novel      |
| chr20 | 44113842  | A | A | T | CDS    | SLC12A5  | NM_001134771 | + | missense   | c.2372A>T  | p.H791L  | novel      |
| chr20 | 54460430  | C | C | T | CDS    | CASS4    | NM_001164114 | + | missense   | c.629C>T   | p.A210V  | novel      |
| chr20 | 60856560  | G | G | A | CDS    | NTSR1    | NM_002531    | + | missense   | c.793G>A   | p.V265I  | novel      |

|       |           |   |   |   |            |          |              |   |            |           |          |            |
|-------|-----------|---|---|---|------------|----------|--------------|---|------------|-----------|----------|------------|
| chr20 | 62112023  | C | C | T | CDS        | PRPF6    | NM_012469    | + | missense   | c.1213C>T | p.R405C  | novel      |
| chr21 | 9990919   | G | G | A | intron     | TPTE     | NM_199261    | - |            |           |          | novel      |
| chr21 | 43365302  | G | G | A | CDS        | CBS      | NM_000071    | - | missense   | c.71C>T   | p.A24V   | novel      |
| chr21 | 45100542  | T | T | C | CDS        | PTTG1IP  | NM_004339    | - | missense   | c.443A>G  | p.E148G  | novel      |
| chr21 | 45712919  | C | C | T | CDS        | COL18A1  | NM_130444    | + | missense   | c.1687C>T | p.H563Y  | novel      |
| chr22 | 20318714  | A | A | G | CDS        | CCDC116  | NM_152612    | + | missense   | c.476A>G  | p.N159S  | novel      |
| chr22 | 24437136  | C | C | A | intron     | ADRBK2   | NM_005160    | + |            |           |          | novel      |
| chr22 | 36101314  | G | G | A | CDS        | ELFN2    | NM_052906    | - | synonymous | c.207C>T  | p.A69A   | novel      |
| chr22 | 49247720  | C | C | T | CDS        | SBF1     | NM_002972    | - | missense   | c.2176G>A | p.V726M  | novel      |
| chr3  | 3070549   | C | C | T | CDS        | CNTN4    | NM_175612    | + | missense   | c.638C>T  | p.S213L  | novel      |
| chr3  | 7595588   | T | T | A | CDS        | GRM7     | NM_181874    | + | synonymous | c.1995T>A | p.G665G  | novel      |
| chr3  | 53857711  | T | T | G | intron     | IL17RB   | NM_018725    | + |            |           |          | novel      |
| chr3  | 75796653  | C | C | T | intron     | FRG2C    | NM_001124759 | + |            |           |          | novel      |
| chr3  | 99466292  | T | T | C | CDS        | OR5H6    | NM_001005479 | + | synonymous | c.474T>C  | p.I158I  | novel      |
| chr3  | 184416532 | T | T | C | CDS        | MCF2L2   | NM_015078    | - | synonymous | c.2415A>G | p.L805L  | rs61674109 |
| chr4  | 4290490   | C | C | T | CDS        | TMEM128  | NM_032927    | - | missense   | c.400G>A  | p.V134I  | rs2433883  |
| chr4  | 70195110  | A | A | G | CDS        | UGT2B28  | NM_053039    | + | synonymous | c.1584A>G | p.R528R  | novel      |
| chr4  | 129024099 | A | A | G | CDS        | PLK4     | NM_014264    | + | missense   | c.278A>G  | p.H93R   | novel      |
| chr5  | 281288    | C | C | T | intron     | SDHA     | NM_004168    | + |            |           |          | novel      |
| chr5  | 37400179  | G | G | A | CDS        | NUP155   | NM_004298    | - | synonymous | c.45C>T   | p.S15S   | novel      |
| chr5  | 38406255  | G | G | A | CDS        | EGFLAM   | NM_152403    | + | missense   | c.646G>A  | p.V216M  | novel      |
| chr5  | 40800912  | T | T | C | CDS        | PRKAA1   | NM_206907    | - | missense   | c.1052A>G | p.H351R  | novel      |
| chr5  | 59978940  | T | T | C | intron     | DEPDC1B  | NM_001145208 | - |            |           |          | novel      |
| chr5  | 82852445  | C | C | A | CDS        | VCAN     | NM_004385    | + | missense   | c.2564C>A | p.T855N  | novel      |
| chr5  | 112203052 | G | G | T | CDS        | APC      | NM_000038    | + | nonsense   | c.3862G>T | p.G1288* | novel      |
| chr5  | 115266534 | T | T | C | CDS        | AP3S1    | NM_001284    | + | synonymous | c.399T>C  | p.N133N  | novel      |
| chr5  | 121516360 | A | A | C | CDS        | ZNF474   | NM_207317    | + | missense   | c.776A>C  | p.H259P  | novel      |
| chr5  | 131330057 | A | A | G | CDS        | ACSL6    | NM_001009185 | - | missense   | c.1664T>C | p.L555P  | novel      |
| chr5  | 140288517 | G | G | A | CDS        | PCDHAC1  | NM_031882    | + | missense   | c.1856G>A | p.R619H  | novel      |
| chr5  | 140985981 | C | C | T | CDS        | HDAC3    | NM_003883    | - | missense   | c.884G>A  | p.G295D  | novel      |
| chr5  | 149557006 | C | C | T | CDS        | SLC6A7   | NM_014228    | + | synonymous | c.558C>T  | p.T186T  | novel      |
| chr5  | 156570899 | A | A | G | CDS        | ITK      | NM_005546    | + | synonymous | c.267A>G  | p.L89L   | novel      |
| chr5  | 158072606 | C | C | A | CDS        | EBF1     | NM_024007    | - | missense   | c.1319G>T | p.S440I  | novel      |
| chr6  | 10510827  | G | G | A | CDS        | TFAP2A   | NM_001032280 | - | missense   | c.749C>T  | p.A250V  | novel      |
| chr6  | 26530332  | C | C | T | intergenic |          |              |   |            |           |          | novel      |
| chr6  | 32717072  | C | C | T | CDS        | HLA-DQA1 | NM_002122    | + | synonymous | c.90C>T   | p.H30H   | rs12722043 |
| chr6  | 34833636  | G | T | A | intron     | SNRPC    | NM_003093    | + | rs34781681 |           |          | novel      |
| chr6  | 35895248  | G | G | A | intron     | LHFPL5   | NM_182548    | + |            |           |          | novel      |
| chr6  | 62815719  | A | A | G | intron     | KHDRBS2  | NM_152688    | - |            |           |          | novel      |
| chr6  | 73960977  | G | G | A | CDS        | KCNQ5    | NM_001160134 | + | missense   | c.1588G>A | p.A530T  | novel      |
| chr6  | 136641268 | G | G | C | CDS        | BCLAF1   | NM_001077440 | - | synonymous | c.438C>G  | p.S146S  | novel      |

|      |           |   |   |   |        |         |              |   |            |           |          |            |
|------|-----------|---|---|---|--------|---------|--------------|---|------------|-----------|----------|------------|
| chr6 | 146762230 | G | G | A | CDS    | GRM1    | NM_001114329 | + | missense   | c.2362G>A | p.A788T  | novel      |
| chr6 | 151399951 | G | G | A | intron | MTHFD1L | NM_015440    | + |            |           |          | novel      |
| chr6 | 152772411 | C | C | G | CDS    | SYNE1   | NM_033071    | - | missense   | c.6378G>C | p.E2126D | novel      |
| chr7 | 5296881   | G | G | T | intron | SLC29A4 | NM_153247    | + | rs73051947 |           |          | novel      |
| chr7 | 5888628   | T | T | A | intron | OCM     | NM_001097622 | + |            |           |          | novel      |
| chr7 | 63805765  | A | A | G | CDS    | ZNF107  | NM_016220    | + | missense   | c.1648A>G | p.K550E  | novel      |
| chr7 | 70438532  | C | C | T | CDS    | WBSCR17 | NM_022479    | + | missense   | c.299C>T  | p.P100L  | novel      |
| chr7 | 76078825  | G | G | A | CDS    | POMZP3  | NM_012230    | - | synonymous | c.457C>T  | p.L153L  | rs72508677 |
| chr7 | 99924803  | C | C | T | CDS    | C7orf51 | NM_173564    | + | missense   | c.1523C>T | p.P508L  | novel      |
| chr7 | 100625939 | G | G | A | utr    | MOGAT3  | NM_178176    | - |            |           |          | novel      |
| chr7 | 103155828 | A | A | T | CDS    | RELN    | NM_173054    | - | missense   | c.719T>A  | p.V240D  | novel      |
| chr7 | 114055884 | G | G | T | CDS    | FOXP2   | NM_148898    | + | missense   | c.387G>T  | p.M129I  | novel      |
| chr7 | 129749771 | C | C | T | utr    | CPA4    | NM_001163446 | + |            |           |          | novel      |
| chr7 | 149664919 | C | C | G | CDS    | LRRRC61 | NM_001142928 | + | synonymous | c.36C>G   | p.G12G   | novel      |
| chr7 | 151575993 | G | G | A | CDS    | MLL3    | NM_170606    | - | missense   | c.2459C>T | p.T820I  | rs932840   |
| chr7 | 151601792 | C | C | A | CDS    | MLL3    | NM_170606    | - | missense   | c.943G>T  | p.G315C  | novel      |
| chr7 | 151601810 | G | G | A | CDS    | MLL3    | NM_170606    | - | missense   | c.925C>T  | p.P309S  | novel      |
| chr8 | 41909356  | C | C | A | CDS    | MYST3   | NM_001099413 | - | missense   | c.5539G>T | p.G1847W | novel      |
| chr8 | 52895518  | C | C | T | CDS    | PCMTD1  | NM_052937    | - | synonymous | c.1020G>A | p.K340K  | novel      |
| chr8 | 101786396 | C | C | T | CDS    | PABPC1  | NM_002568    | - | missense   | c.1752G>A | p.M584I  | novel      |
| chr8 | 101794213 | A | A | G | intron | PABPC1  | NM_002568    | - |            |           |          | novel      |
| chr9 | 33374977  | T | T | G | utr    | AQP7    | NM_001170    | - | rs11555075 |           |          | novel      |
| chr9 | 33786660  | T | T | C | CDS    | PRSS3   | NM_007343    | + | synonymous | c.231T>C  | p.D77D   | novel      |
| chr9 | 34647114  | C | C | T | CDS    | IL11RA  | NM_001142784 | + | synonymous | c.414C>T  | p.S138S  | novel      |
| chr9 | 107464632 | C | C | A | CDS    | TAL2    | NM_005421    | + | synonymous | c.34C>A   | p.R12R   | novel      |
| chr9 | 122707234 | T | T | C | CDS    | TRAF1   | NM_005658    | - | missense   | c.1136A>G | p.N379S  | novel      |
| chr9 | 124681927 | A | A | G | CDS    | RC3H2   | NM_001100588 | - | synonymous | c.1140T>C | p.A380A  | novel      |
| chrX | 3252292   | C | C | G | CDS    | MXRA5   | NM_015419    | - | missense   | c.1434G>C | p.M478I  | novel      |
| chrX | 100694666 | G | G | A | CDS    | ARMCX1  | NM_016608    | + | missense   | c.97G>A   | p.E33K   | novel      |
| chrX | 102750956 | A | A | G | CDS    | TCEAL3  | NM_032926    | + | missense   | c.308A>G  | p.E103G  | novel      |
| chrX | 135313145 | G | G | A | CDS    | GPR112  | NM_153834    | + | synonymous | c.8652G>A | p.P2884P | novel      |
