# Supplementary material for: Discovery of biclonal origin and a novel oncogene SLC12A5 in colon cancer by single-cell sequencing
Source: Springer Nature journal article supplement (doi:10.1038/cr.2014.43), 2014-04-04
Supplement: 41422_2014_BFcr201443_MOESM51_ESM.pdf [file 41422_2014_BFcr201443_MOESM51_ESM.pdf]

**Supplementary information, Table S2** Relative contribution of individual genes with non-synonymous mutations to principal component 1 (PC1) and PC2.

| <b>Gene</b>     | <b>PC1</b> | <b>PC2</b> |
|-----------------|------------|------------|
| <i>UNC13D</i>   | 0.853336   | 0.410662   |
| <i>MMEL1</i>    | 0.353118   | -0.718642  |
| <i>MAFB</i>     | 0.170644   | -0.534614  |
| <i>COL18A1</i>  | 0.103604   | 0.024100   |
| <i>RAB25</i>    | 0.096520   | -0.030710  |
| <i>TIMP2</i>    | 0.093306   | -0.009278  |
| <i>GRM1</i>     | 0.090546   | 0.028563   |
| <i>ZNF180</i>   | 0.082410   | 0.027959   |
| <i>APBA2</i>    | 0.080481   | 0.008451   |
| <i>APC</i>      | 0.077080   | 0.015870   |
| <i>PRKAA1</i>   | 0.062863   | 0.004390   |
| <i>RNF213</i>   | 0.062376   | -0.112847  |
| <i>CASS4</i>    | 0.058368   | 0.014003   |
| <i>EBF1</i>     | 0.058127   | 0.012251   |
| <i>XIRP2</i>    | 0.052410   | -0.064906  |
| <i>TP53</i>     | 0.050056   | -0.015397  |
| <i>MS4A2</i>    | 0.049786   | -0.011828  |
| <i>SRRM2</i>    | 0.049178   | -0.013748  |
| <i>KCNQ5</i>    | 0.047863   | 0.004166   |
| <i>SORBS1</i>   | 0.047025   | 0.005152   |
| <i>TFAP2A</i>   | 0.046965   | -0.029584  |
| <i>TMEM132D</i> | 0.045775   | -0.012390  |
| <i>AP3D1</i>    | 0.042425   | -0.019226  |
| <i>HAX1</i>     | 0.040976   | 0.003069   |
| <i>SBF1</i>     | 0.039001   | -0.014374  |
| <i>PCDHAC1</i>  | 0.036323   | 0.001672   |
| <i>ACSL6</i>    | 0.034998   | 0.015119   |
| <i>SLC12A5</i>  | 0.033925   | 0.019629   |
| <i>FERMT2</i>   | 0.033174   | 0.000732   |
| <i>SCGB1D1</i>  | 0.033154   | 0.003702   |
| <i>GPR97</i>    | 0.031927   | 0.009899   |
| <i>CCDC116</i>  | 0.030403   | 0.004171   |
| <i>CACNA1S</i>  | 0.029468   | 0.007234   |
| <i>TIMELESS</i> | 0.027875   | -0.003431  |
| <i>VCAN</i>     | 0.027659   | -0.005059  |
| <i>KCNH3</i>    | 0.026277   | 0.013243   |
| <i>ZNF107</i>   | 0.024701   | -0.004286  |
| <i>GSX1</i>     | 0.024561   | 0.021886   |
| <i>OR51T1</i>   | 0.024049   | 0.000000   |
| <i>CDC27</i>    | 0.022983   | 0.006620   |
| <i>C7orf51</i>  | 0.022980   | 0.002131   |
| <i>CBS</i>      | 0.022690   | -0.009484  |
| <i>ALMS1</i>    | 0.022493   | -0.017412  |
| <i>ADCY9</i>    | 0.022010   | 0.003401   |
| <i>NTSR1</i>    | 0.019707   | 0.001623   |
| <i>HDAC3</i>    | 0.018810   | -0.002116  |
| <i>HPDL</i>     | 0.018721   | -0.000473  |
| <i>RELN</i>     | 0.018667   | -0.000062  |
| <i>WBSCR17</i>  | 0.017246   | 0.000388   |
| <i>MYL1</i>     | 0.017219   | -0.008089  |
| <i>EGFLAM</i>   | 0.016295   | 0.013481   |
| <i>ZNF423</i>   | 0.016167   | 0.001040   |
| <i>FOXP2</i>    | 0.015883   | 0.000517   |
| <i>CNTN4</i>    | 0.015749   | 0.003803   |
| <i>ARMCX1</i>   | 0.015038   | 0.002074   |

|                  |           |           |
|------------------|-----------|-----------|
| <i>PLK4</i>      | 0.014935  | -0.020989 |
| <i>GPSM2</i>     | 0.013540  | -0.006421 |
| <i>SMPD3</i>     | 0.013494  | -0.009768 |
| <i>SLITRK5</i>   | 0.013146  | 0.005249  |
| <i>PRPF6</i>     | 0.013077  | 0.017454  |
| <i>MYST3</i>     | 0.013060  | -0.000570 |
| <i>ELK3</i>      | 0.011713  | -0.001612 |
| <i>USP8</i>      | 0.010802  | 0.000659  |
| <i>SYNE1</i>     | 0.010767  | 0.004872  |
| <i>KIAA1522</i>  | 0.010450  | -0.002133 |
| <i>TRAF1</i>     | 0.009998  | -0.021882 |
| <i>ARL6IP6</i>   | 0.009594  | -0.028242 |
| <i>CENPL</i>     | 0.008022  | 0.002270  |
| <i>PTTG1IP</i>   | 0.007933  | -0.004075 |
| <i>MXRA5</i>     | 0.006191  | -0.002161 |
| <i>OR6C75</i>    | 0.005954  | 0.000869  |
| <i>PARP4</i>     | 0.005521  | -0.008546 |
| <i>KRT38</i>     | 0.002231  | -0.002043 |
| <i>ARID5B</i>    | 0.001721  | -0.004630 |
| <i>USP6</i>      | 0.001670  | -0.007945 |
| <i>PTPN11</i>    | 0.001515  | 0.009754  |
| <i>ZNF474</i>    | 0.001473  | 0.000443  |
| <i>KIR3DL2</i>   | 0.001107  | 0.009861  |
| <i>ZNF285A</i>   | -0.000264 | -0.022641 |
| <i>STAM</i>      | -0.000830 | -0.000743 |
| <i>ZHX3</i>      | -0.001248 | 0.003171  |
| <i>MLL3</i>      | -0.001932 | -0.007741 |
| <i>SIGLEC10</i>  | -0.004037 | -0.001184 |
| <i>KRTAP5-2</i>  | -0.004707 | -0.000185 |
| <i>TNFRSF9</i>   | -0.007839 | -0.012980 |
| <i>PABPC1</i>    | -0.013092 | 0.001697  |
| <i>TCEAL3</i>    | -0.014227 | 0.008777  |
| <i>PABPC3</i>    | -0.015834 | -0.006446 |
| <i>OR5L1</i>     | -0.017233 | -0.005193 |
| <i>LOC649330</i> | -0.040389 | -0.017169 |

---
